# Supplementary material for: Performance evaluation of lithium metal rechargeable batteries with a lithium excess cation-disordered rocksalt based positive electrode under high mass loading and lean electrolyte conditions
Source: Royal Society of Chemistry journal article supplement (doi:10.1039/d3ya00281k), 2024-01-01
Supplement: d3ya00281k1.pdf [file d3ya00281k1.pdf]

## Supplementary Information

Performance evaluation lithium metal rechargeable batteries with lithium excess cation-disordered rocksalt based positive electrode under high mass loading and lean electrolyte condition

*Jitraporn Saengkaew<sup>a</sup>, Emiko Mizuki<sup>a</sup>, Shoichi Matsuda<sup>a,b,c\*</sup>*

<sup>a</sup> Research Center for Energy and Environmental Materials (GREEN), National Institute for Material Science (NIMS), 1-1 Namiki, Tsukuba, Ibaraki 305-0044, Japan

<sup>b</sup> Center for Advanced Battery Collaboration, Center for Green Research on Energy and Environmental Materials, National Institute for Materials Science (NIMS), 1-1 Namiki, Tsukuba, Ibaraki 305-0044, Japan

<sup>c</sup> NIMS-SoftBank Advanced Technologies Development Center, National Institute for Materials Science, 1-1 Namiki, Tsukuba, Ibaraki 305-0044, Japan

|                         | thickness | porosity | density            |
|-------------------------|-----------|----------|--------------------|
|                         | mm        | %        | mg/cm <sup>2</sup> |
| Aluminum foil           | 0.01      | 0        | 2.67               |
| Copper foil             | 0.002     | 0        | 1.80               |
| Glass fiber separator   | 0.26      | 91       | 5.12               |
| Polypropylene separator | 0.02      | 45       | 1.08               |

**Table S1.** Parameters of the employed LMBs.

**Table S2.** Energy density simulation of LMB equipped with positive electrode material with capacity of 300 mAh/g and average discharge voltage of 3.1 V.

|                                   |       |       |       |                     |
|-----------------------------------|-------|-------|-------|---------------------|
| Active material                   | 10    | 10    | 30    | mg/cm <sup>2</sup>  |
| Active material ratio             | 0.7   | 0.7   | 0.95  |                     |
| Al foil                           | 2.67  | 2.67  | 2.67  | mg/cm <sup>2</sup>  |
| Conductive additives and binder   | 3     | 3     | 1.5   | mg/cm <sup>2</sup>  |
| Separator                         | 5.12  | 1.08  | 1.08  | mg/cm <sup>2</sup>  |
| Electrolyte in positive electrode | 1.67  | 1.67  | 5     | mg/cm <sup>2</sup>  |
| Electrolyte in separator          | 24    | 0.9   | 0.9   | mg/cm <sup>2</sup>  |
| Lithium                           | 2.67  | 2.67  | 2.67  | mg/cm <sup>2</sup>  |
| Cu foil                           | 1.8   | 1.8   | 1.8   | mg/cm <sup>2</sup>  |
| Total mass                        | 50.93 | 23.79 | 45.62 | mg/cm <sup>2</sup>  |
| Areal capacity                    | 2.1   | 2.1   | 8.55  | mAh/cm <sup>2</sup> |
| Average discharge voltage         | 3.1   | 3.1   | 3.1   | V                   |
| Energy density                    | 127.8 | 273.6 | 580.9 | Wh/kg               |
| E/C                               | 12.2  | 1.2   | 0.7   | g/Ah                |

**Table S2.** Energy density simulation of LMB equipped with positive electrode material with capacity of 200 mAh/g and average discharge voltage of 3.7 V.

|                                   |       |       |       |                     |
|-----------------------------------|-------|-------|-------|---------------------|
| Active material                   | 10    | 10    | 30    | mg/cm <sup>2</sup>  |
| Active material ratio             | 0.7   | 0.7   | 0.95  |                     |
| Al foil                           | 2.67  | 2.67  | 2.67  | mg/cm <sup>2</sup>  |
| Conductive additives and binder   | 3     | 3     | 1.5   | mg/cm <sup>2</sup>  |
| Separator                         | 5.12  | 1.08  | 1.08  | mg/cm <sup>2</sup>  |
| Electrolyte in positive electrode | 1.67  | 1.67  | 5     | mg/cm <sup>2</sup>  |
| Electrolyte in separator          | 24    | 0.9   | 0.9   | mg/cm <sup>2</sup>  |
| Lithium                           | 2.67  | 2.67  | 2.67  | mg/cm <sup>2</sup>  |
| Cu foil                           | 1.8   | 1.8   | 1.8   | mg/cm <sup>2</sup>  |
| Total mass                        | 50.93 | 23.79 | 45.62 | mg/cm <sup>2</sup>  |
| Areal capacity                    | 1.4   | 1.4   | 5.7   | mAh/cm <sup>2</sup> |
| Average discharge voltage         | 3.7   | 3.7   | 3.7   | V                   |
| Energy density                    | 101.7 | 217.7 | 462.3 | Wh/kg               |
| E/C                               | 18.3  | 1.83  | 1.03  | g/Ah                |

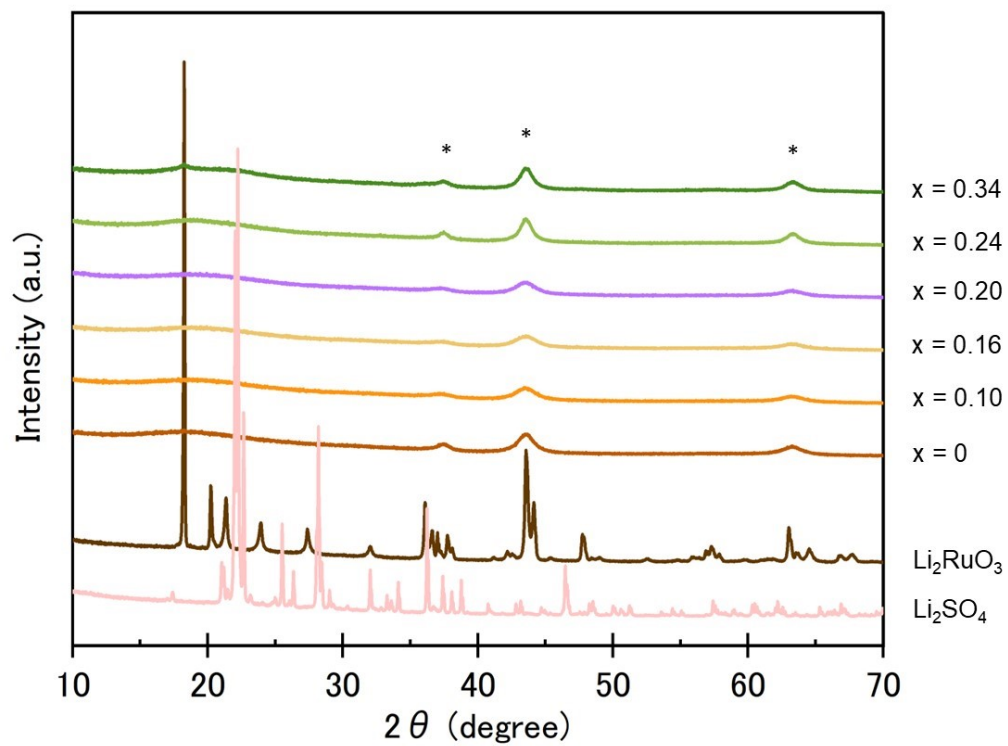

**Figure S4.** XRD profiles of  $\text{Li}_2\text{RuO}_3/\text{Li}_2\text{SO}_4$  samples.

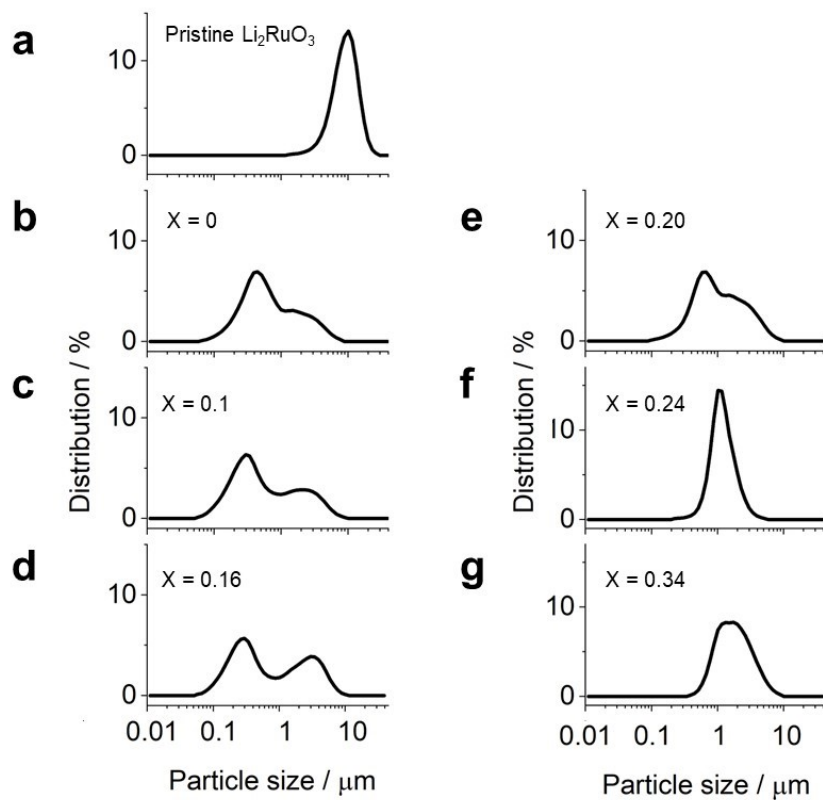

**Figure S5.** Particle size distribution of (a) pristine  $\text{Li}_2\text{RuO}_3$  and (b-g)  $\text{Li}_2\text{RuO}_3/\text{Li}_2\text{SO}_4$  samples.

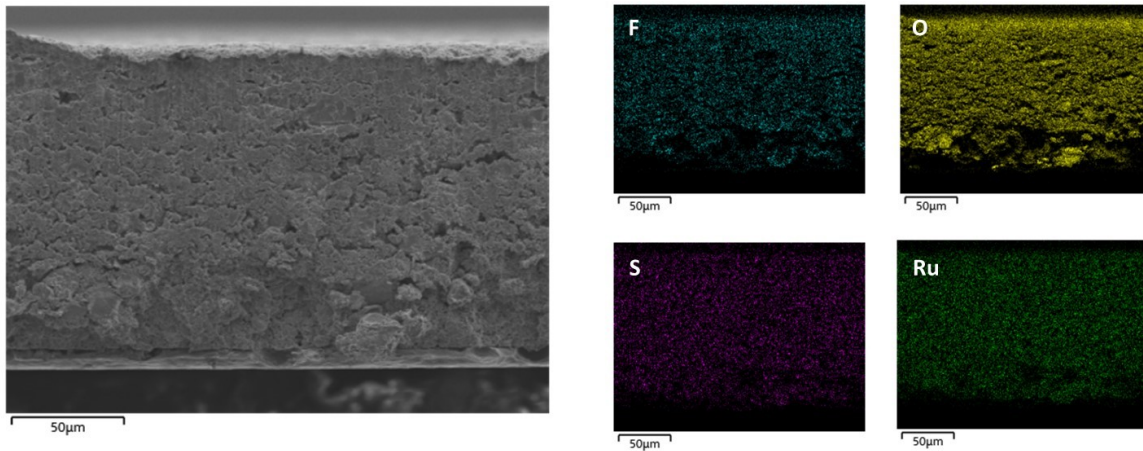

**Figure S6.** Cross sectional SEM images of  $\text{Li}_2\text{RuO}_3/\text{Li}_2\text{SO}_4$  electrodes with  $x = 0.2$ .

**Table S7.** Technological parameters for cell A and B.

|                           |              | Cell A                   | Cell B             |                     |
|---------------------------|--------------|--------------------------|--------------------|---------------------|
| Aluminum foil             | Mass loading | 2.7                      | 2.7                | mg/cm <sup>2</sup>  |
|                           | Thickness    | 10                       | 10                 | μm                  |
| Positive Electrode        | Mass loading | 20                       | 30                 | mg/cm <sup>2</sup>  |
| Electrolyte               | Composition  | 1M LiFSI<br>in sulfolane | 4M LiFSI<br>In DME |                     |
|                           | Mass loading | 15                       | 10                 | mg/cm <sup>2</sup>  |
| PO separator              | Mass loading | 1.08                     | 1.08               | mg/cm <sup>2</sup>  |
|                           | Thickness    | 20                       | 20                 | μm                  |
| Ceramic separator         | Mass loading | 29.3                     |                    | mg/cm <sup>2</sup>  |
|                           | Thickness    | 90                       |                    | μm                  |
| PO separator              | Mass loading | 1.08                     |                    | mg/cm <sup>2</sup>  |
|                           | Thickness    | 20                       |                    | μm                  |
| Electrolyte               | Composition  | 4M LiFSI<br>In DME       |                    |                     |
|                           | Mass loading | 2.5                      |                    | mg/cm <sup>2</sup>  |
| Lithium foil              | Mass loading | 2.67                     | 2.67               | mg/cm <sup>2</sup>  |
|                           | Thickness    | 100                      | 20                 | μm                  |
| Copper foil               | Mass loading | 10.8                     | 1.8                | mg/cm <sup>2</sup>  |
|                           | Thickness    | 12                       | 2                  | μm                  |
| Total Weight              |              | 85.1                     | 48.2               | mg/cm <sup>2</sup>  |
| Average Discharge Voltage |              | 3.15                     | 3.12               | V                   |
| Areal Capacity            |              | 5.92                     | 7.77               | mAh/cm <sup>2</sup> |
| E/C                       |              | 2.95                     | 1.28               | g/Ah                |
| Energy density            |              | 219.0                    | 502.3              | Wh/kg               |



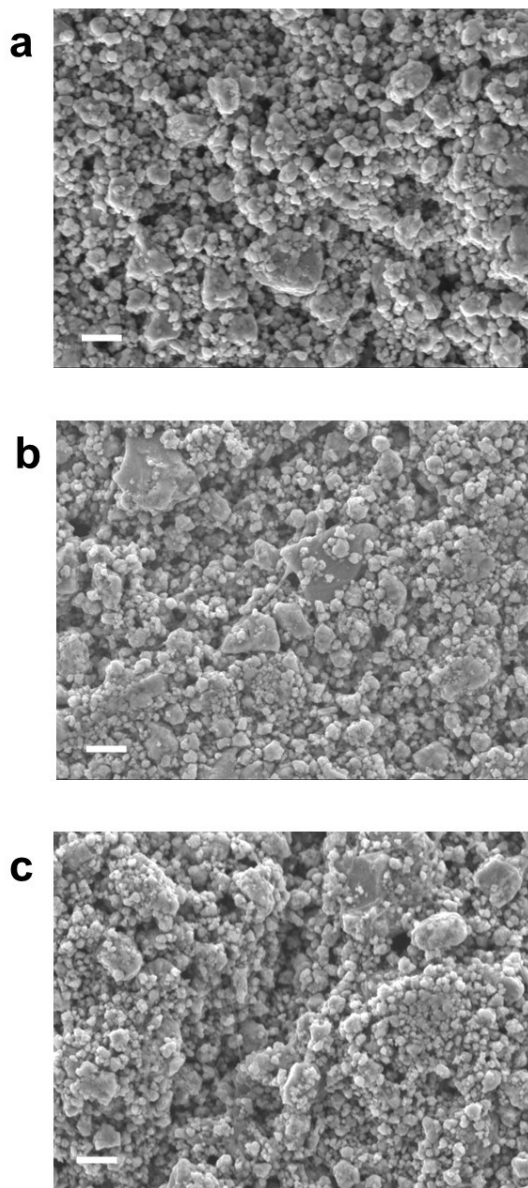

**Figure S8.** SEM images of  $\text{Li}_2\text{RuO}_3/\text{Li}_2\text{SO}_4$  electrodes with  $x = 0.2$  (a) before and after 40th cycle taken out from (b) cell A and (c) cell B. Scale bar is 1  $\mu\text{m}$ .

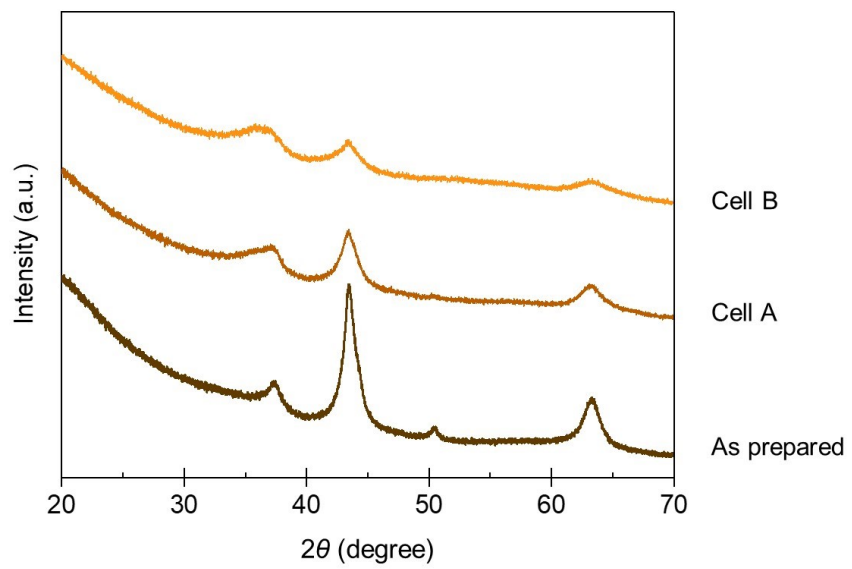

**Figure S9.** XRD profiles of  $\text{Li}_2\text{RuO}_3/\text{Li}_2\text{SO}_4$  electrodes before and after 40th cycle
